# Supplementary material for: Design, synthesis, and characterization of non-hemolytic antimicrobial peptides related to human cathelicidin LL-37
Source: Royal Society of Chemistry journal article supplement (doi:10.1039/d3ra02473c), 2023-01-01
Supplement: d3ra02473c1.pdf [file d3ra02473c1.pdf]

## Supporting Information

### Design, Synthesis and Characterization of Non-Hemolytic Antimicrobial Peptides Related to Human Cathelicidin LL-37

Rajavenkatesh K<sup>1\*,2</sup>, Priyanka Adhikari<sup>3</sup>, Parthiban A<sup>3</sup>

<sup>1</sup>Organic and Bioorganic Chemistry Laboratory CSIR-CLRI, Adyar, Chennai-600020, Tamil Nadu, India

<sup>2</sup>Department of Chemistry, Sethu Institute of Technology, Kariapatti, Virudunagar-626115, Tamil Nadu, India

<sup>3</sup>Centre for GMP extraction facility (Dept. of Biotechnology), National Institute of Pharmaceutical Education and Research, Guwahati-781101, Assam, India

#### Corresponding author

Dr. K. RAJAVENKATESH

Department of Chemistry,

Sethu Institute of Technology,

Kariapatti, Virudunagar-626115,, Tamil Nadu, India.

Email: [krajavenkateshkcmp5@gmail.com](mailto:krajavenkateshkcmp5@gmail.com) / [rajavenkateshk2@sethu.ac.in](mailto:rajavenkateshk2@sethu.ac.in)

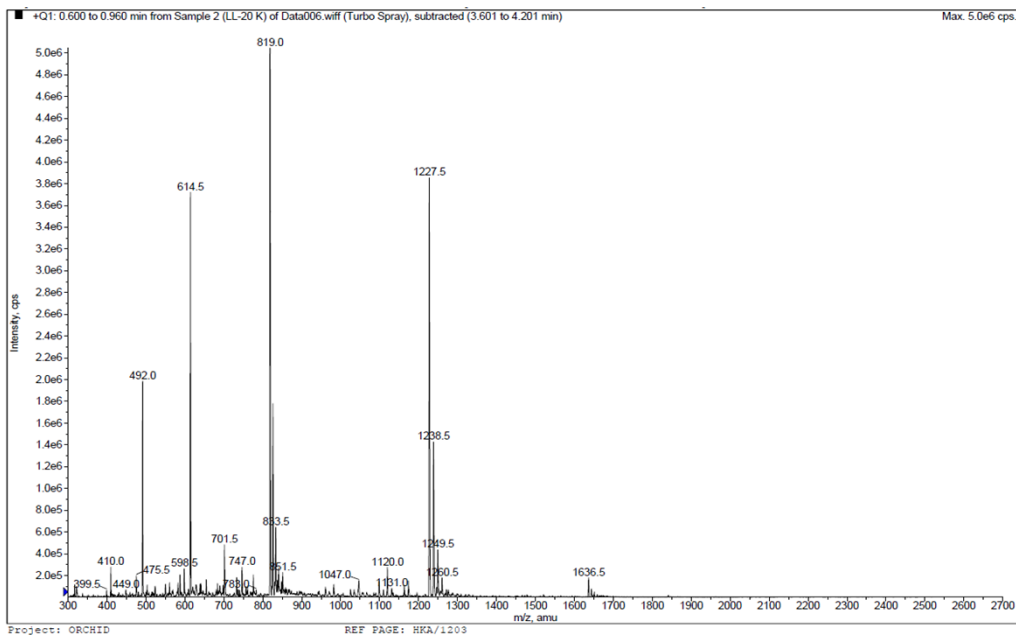

Figure S1: ESI mass spectrum of P1

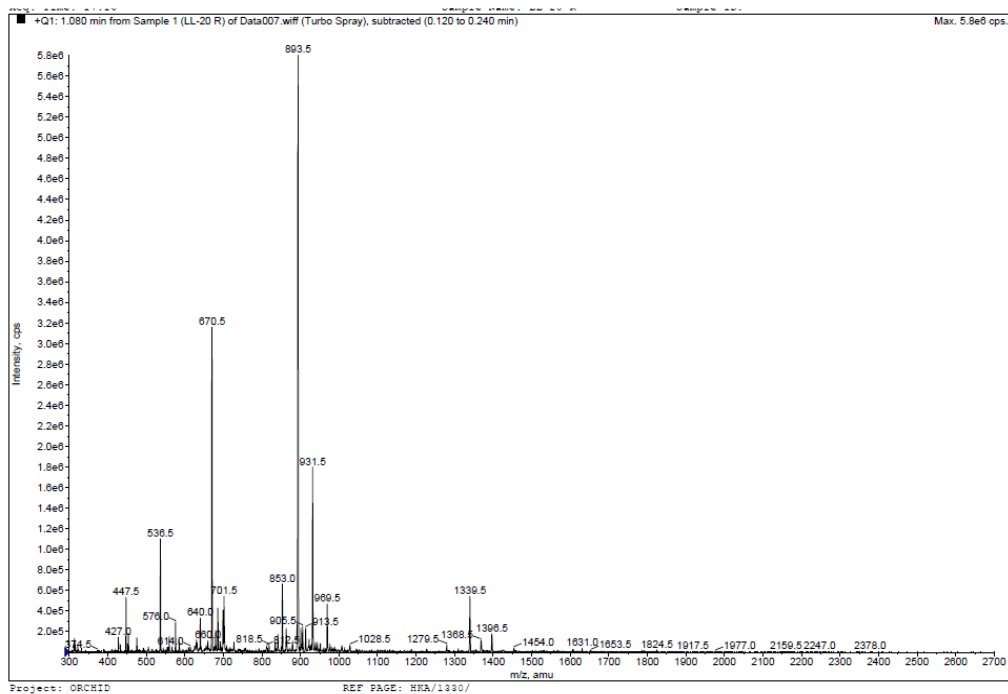

Figure S2: ESI mass spectrum of P2

### P1 in 80 mM SDS-d<sub>25</sub>

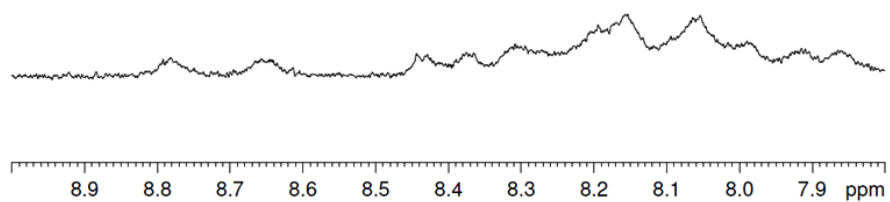

### P1 in Buffer

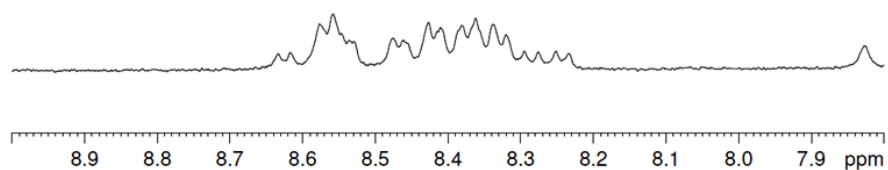

### P1 in 80 mM SDS-d<sub>25</sub>

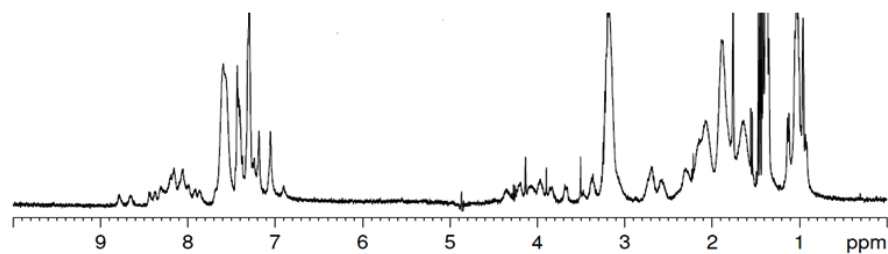

### P1 in Buffer

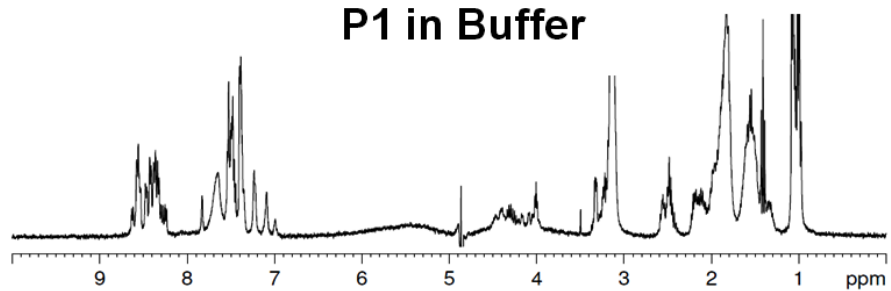

**Figure S3:** An overlay of <sup>1</sup>H NMR Spectra of P1 in Buffer and SDS-d<sub>25</sub>.

**P2 in 80 mM SDS-d25**

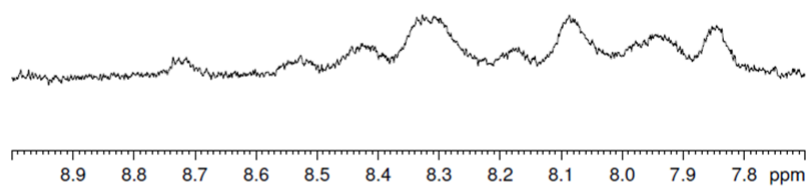

**P2 in Buffer**

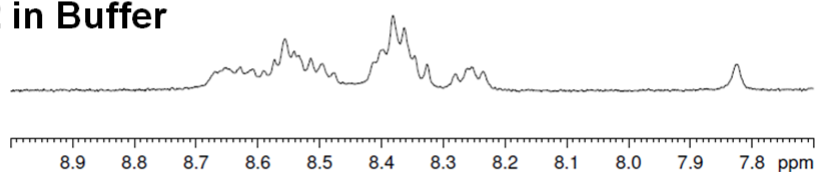

**P2 in 80 mM SDS-d25**

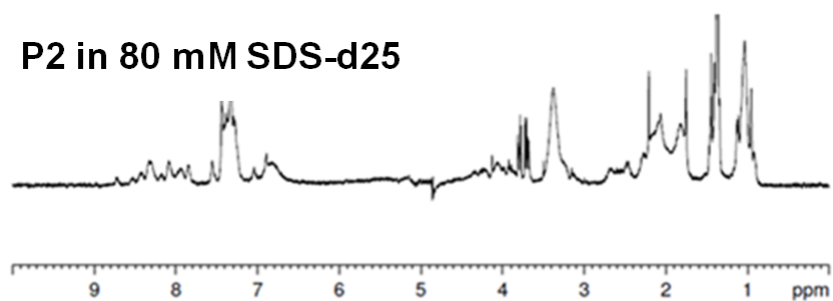

**P2 in Buffer**

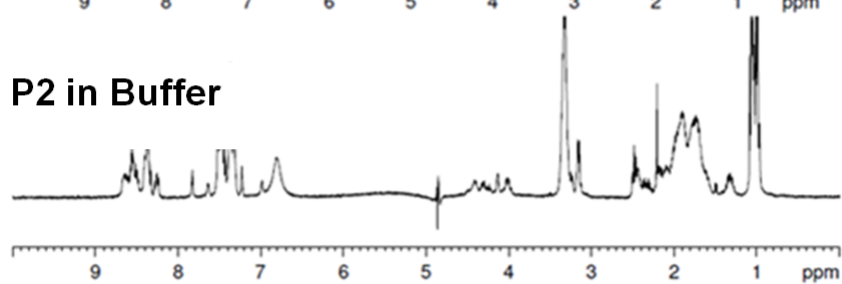

**Figure S4:** An overlay of <sup>1</sup>H NMR Spectra of P2 in Buffer and SDS-d<sub>25</sub>.

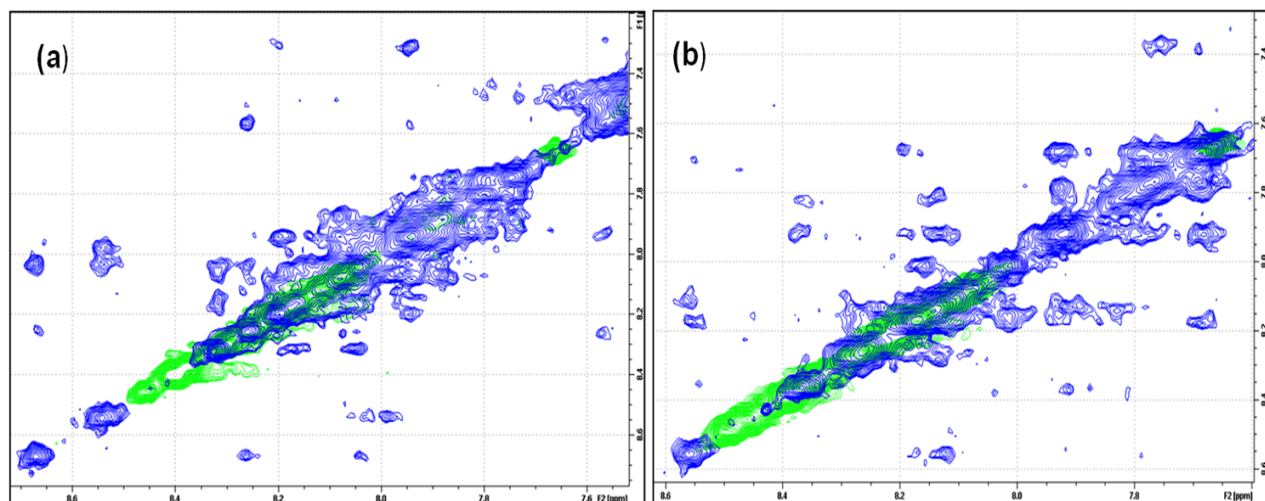

**Figure S5:** NH-NH Region of NOESY Spectra of (a) P1 and (b) P2 in buffer (green), and SDS-d<sub>25</sub>(blue)

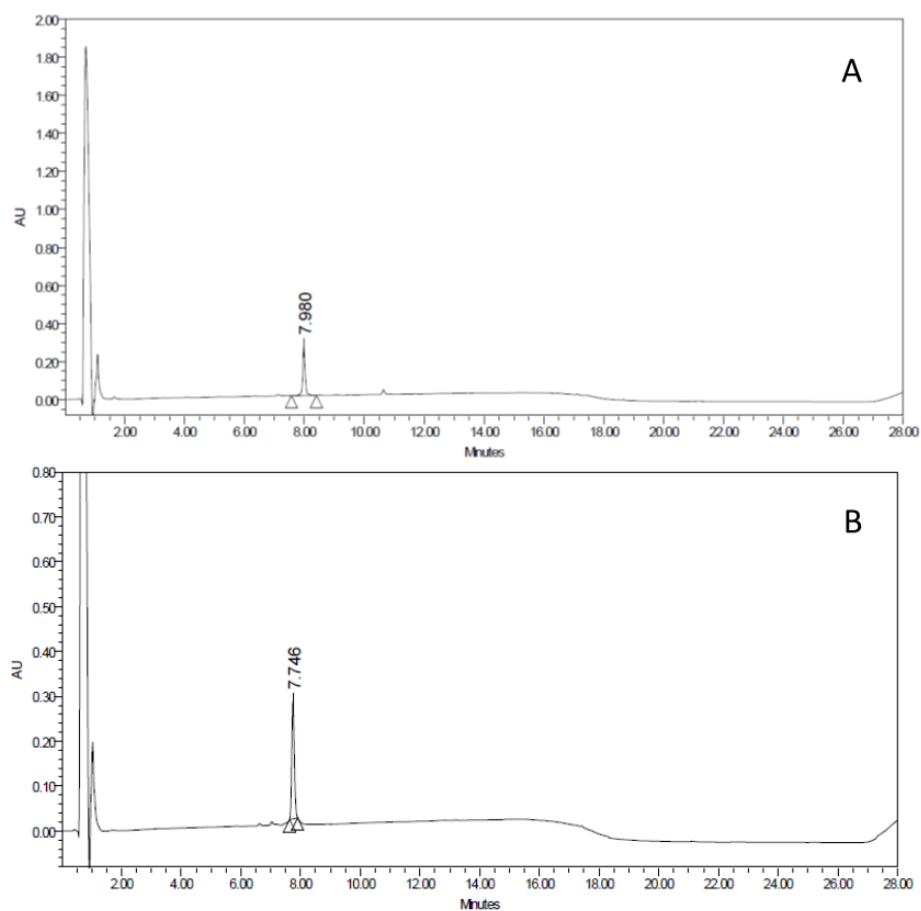

**Figure S6:** Optimization of elution conditions and column suitable for HPLC based binding assay: A) Detection of unbound peptides isolated from Peptide-MLVs mixtures. B) Detection of unbound peptides isolated from Peptide-MLVs mixtures.

**Table S1: Antimicrobial activity of synthesized peptides**

| <b>Microorganism</b>          | <b>Zone of Inhibition(mm)</b> |                  |                  | <b>MIC (<math>\mu\text{g/mL}</math>)</b> |           |           |
|-------------------------------|-------------------------------|------------------|------------------|------------------------------------------|-----------|-----------|
|                               | <b>LL-37 (5-24)</b>           | <b>P1</b>        | <b>P2</b>        | <b>LL-37 (5-24)</b>                      | <b>P1</b> | <b>P2</b> |
| <i>Staphylococcus aureus</i>  | 19.54 $\pm$ 0.84              | 21.66 $\pm$ 0.41 | 15.66 $\pm$ 0.95 | 10                                       | 25.00     | 35.00     |
| <i>Bacillus subtilis</i>      | 21.22 $\pm$ 0.65              | 15.00 $\pm$ 0.38 | 17.00 $\pm$ 0.33 | 0.6                                      | 35.00     | 30.00     |
| <i>Escherichia coli</i>       | 22.89 $\pm$ 0.25              | 23.33 $\pm$ 0.20 | 13.66 $\pm$ 0.35 | 0.8                                      | 20.00     | 35.00     |
| <i>Pseudomonas aeruginosa</i> | 20.22 $\pm$ 0.83              | 14.00 $\pm$ 0.84 | 17.00 $\pm$ 0.28 | 25                                       | 35.00     | 30.00     |
